# Supplementary material
Source: PubMed Central journal article supplement (PMC3777854)
Supplement: NIHMS513647-supplement-Supp_Fig_S1.pdf [file NIHMS513647-supplement-Supp_Fig_S1.pdf]

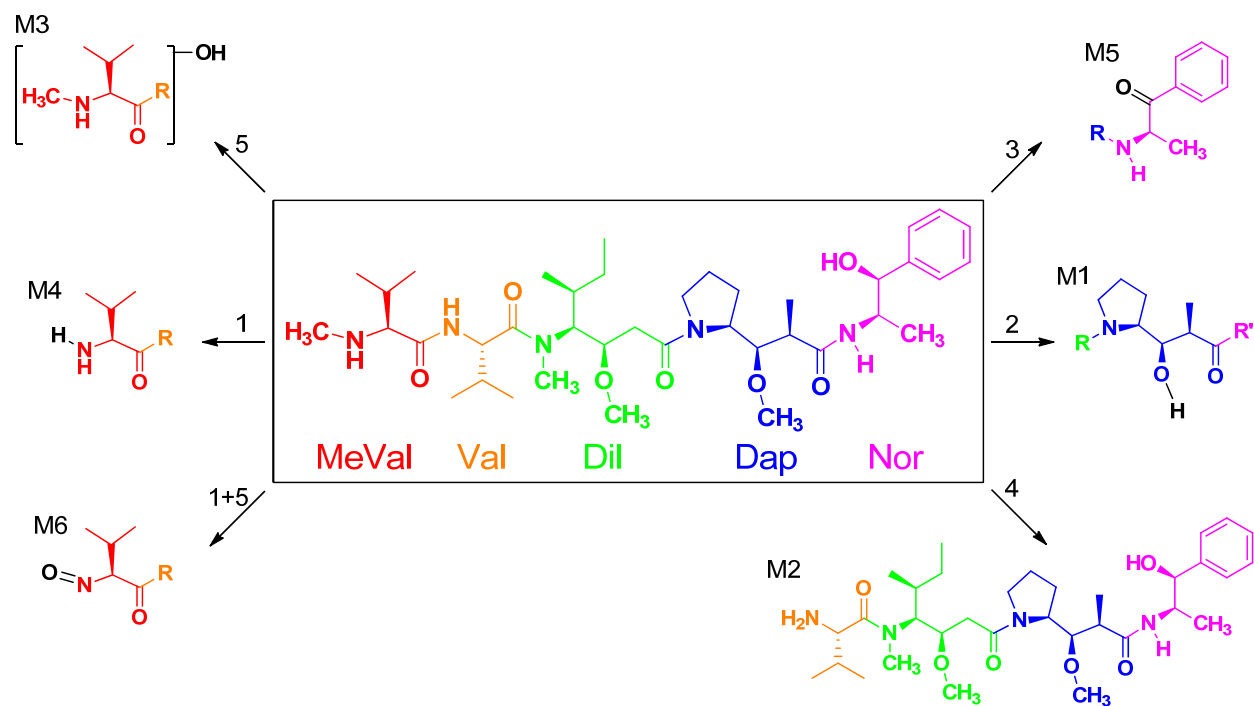

Additional metabolites as combinations of the above biotransformations:

M7 (M5 + M6)

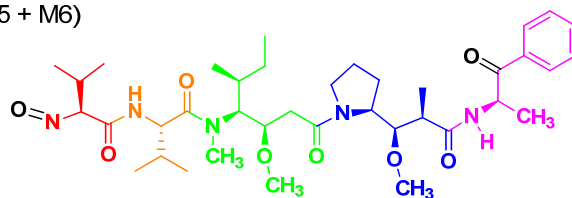

M8 (M1 + M5)

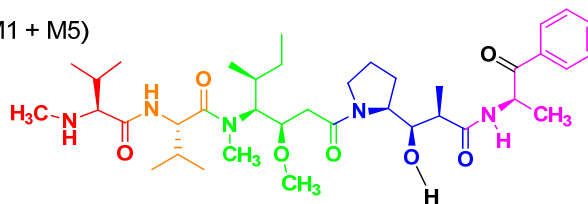

1. N-demethylation (CYP3A)
2. O-demethylation (CYP3A)
3. Dehydrogenation (CYP3A)
4. Amide hydrolysis
5. Oxidation

**Supplemental Figure 1. Metabolic pathways of MMAE in humans.**
